# Supplementary material for: PDGF Upregulates Mcl-1 Through Activation of β-Catenin and HIF-1α-Dependent Signaling in Human Prostate Cancer Cells
Source: PubMed Central journal article supplement (PMC3262835; doi:10.1371/journal.pone.0030764), 2012-01-20
Supplement: pone.0030764.s007.pdf [file pone.0030764.s007.pdf]

| <b>Antibody</b>                  | <b>Host Animal</b> | <b>Company</b>     | <b>Cat. No.</b> | <b>Dilution</b> |
|----------------------------------|--------------------|--------------------|-----------------|-----------------|
| $\beta$ -actin                   | Mouse              | Sigma              | A 5441          | 1-1000          |
| $\beta$ -catenin                 | Mouse              | BD<br>Transduction | 610154          | 1-500           |
| $\beta$ -catenin (H-102)         | Rabbit             | Santa Cruz         | sc-7199         | 1-500           |
| <i>Bcl-2 (N-19)</i>              | Rabbit             | Santa Cruz         | sc-492          | 1-100           |
| c-Abl(24-11)                     | Mouse              | Santa Cruz         | sc-23           | 1-200           |
| E-cadherin (H-108)               | Rabbit             | Santa Cruz         | sc-7870         | 1-500           |
| HIF-1 $\alpha$                   | Rabbit             | Millipore          | 07-628          | 1-200           |
| HIF-1 $\alpha$                   | Mouse              | BD<br>Transduction | 610958          | 1-200           |
| Mcl-1                            | Rabbit             | Santa Cruz         | sc-819          | 1-500           |
| p68 RNA Helicase (H-144)         | Rabbit             | Santa Cruz         | sc-32858        | 1-200           |
| PARP                             | Rabbit             | Cell<br>Signaling  | 9542            | 1-500           |
| PDGFR- $\alpha$ (951)            | Rabbit             | Santa Cruz         | sc-431          | 1-100           |
| PDGFR- $\beta$                   | Rabbit             | Santa Cruz         | sc-339          | 1-100           |
| TCF-4 (N-20)                     | Goat               | Santa Cruz         | sc-8631         | 1-100           |
| TFIID (TBP) (N-12)               | Rabbit             | Santa Cruz         | sc-204          | 1-200           |
| Phospho-c-Abl (Tyr 245)          | Rabbit             | Cell<br>Signaling  | 2861            | 1-500           |
| Phospho-PDGFR- $\alpha$ (Tyr754) | Rabbit             | Cell<br>Signaling  | 2992            | 1-1000          |
| Phospho-PDGFR- $\beta$ (Tyr751)  | Mouse              | Cell<br>Signaling  | 3166            | 1-1000          |
| Phospho-Tyrosine (P-Tyr-100)     | Mouse              | Cell<br>Signaling  | 9411            | 1-1000          |
| Normal IgG                       | Rabbit             | Cell<br>Signaling  | 2729            |                 |
| Normal IgG                       | Mouse              | Millipore          | 12-371          |                 |
